# Supplementary material for: Prediction of eye color in the Slovenian population using the IrisPlex SNPs
Source: PubMed Central journal article supplement (PMC3760663; doi:10.3325/cmj.2013.54.381), 2013-08
Supplement: CroatMedJ_54_s002.pdf [file CroatMedJ_54_s002.pdf]

Supplementary Table 3: Genotypes for the six currently most eye colour-informative SNPs and eye color prediction probabilities for 105 Slovene volunteers.

| Identification number | Population | Volunteers eye color | rs16891982 | rs12203592 | rs1800407 | rs12913832 | rs12896399 | rs1393350 | blue (p) | intermediate (p) | brown (p) |
|-----------------------|------------|----------------------|------------|------------|-----------|------------|------------|-----------|----------|------------------|-----------|
| 1                     | Slovenian  | blue                 | G          | C          | GA        | C          | GT         | C         | 0,945    | 0,045            | 0,011     |
| 2                     | Slovenian  | blue                 | G          | C          | G         | C          | GT         | C         | 0,919    | 0,048            | 0,033     |
| 3                     | Slovenian  | intermediate         | G          | C          | GA        | CT         | T          | C         | 0,202    | 0,286            | 0,512     |
| 4                     | Slovenian  | blue                 | G          | C          | G         | C          | GT         | CT        | 0,937    | 0,041            | 0,022     |
| 5                     | Slovenian  | brown                | G          | C          | GA        | T          | G          | C         | 0,008    | 0,071            | 0,921     |
| 6                     | Slovenian  | blue                 | G          | C          | GA        | CT         | G          | C         | 0,419    | 0,211            | 0,371     |
| 7                     | Slovenian  | blue                 | G          | C          | G         | C          | T          | C         | 0,870    | 0,076            | 0,053     |
| 8                     | Slovenian  | intermediate         | G          | C          | G         | CT         | GT         | C         | 0,150    | 0,140            | 0,711     |
| 9                     | Slovenian  | brown                | G          | C          | GA        | T          | GT         | C         | 0,005    | 0,071            | 0,924     |
| 10                    | Slovenian  | blue                 | G          | C          | GA        | C          | GT         | CT        | 0,955    | 0,038            | 0,007     |
| 11                    | Slovenian  | brown                | G          | C          | G         | CT         | T          | C         | 0,094    | 0,148            | 0,758     |
| 12                    | Slovenian  | brown                | G          | C          | G         | CT         | G          | C         | 0,229    | 0,128            | 0,643     |
| 13                    | Slovenian  | brown                | G          | C          | GA        | T          | T          | C         | 0,003    | 0,071            | 0,926     |
| 14                    | Slovenian  | brown                | G          | C          | G         | CT         | GT         | CT        | 0,207    | 0,161            | 0,632     |
| 15                    | Slovenian  | intermediate         | GC         | C          | GA        | CT         | GT         | CT        | 0,143    | 0,222            | 0,635     |
| 16                    | Slovenian  | blue                 | G          | C          | G         | C          | G          | CT        | 0,962    | 0,025            | 0,013     |
| 17                    | Slovenian  | intermediate         | G          | CT         | G         | CT         | GT         | CT        | 0,283    | 0,241            | 0,476     |
| 18                    | Slovenian  | intermediate         | G          | C          | G         | CT         | G          | C         | 0,229    | 0,128            | 0,643     |
| 19                    | Slovenian  | intermediate         | G          | C          | G         | C          | G          | C         | 0,950    | 0,030            | 0,020     |
| 20                    | Slovenian  | brown                | G          | C          | G         | CT         | T          | CT        | 0,134    | 0,175            | 0,691     |
| 21                    | Slovenian  | blue                 | G          | CT         | G         | C          | G          | CT        | 0,965    | 0,027            | 0,007     |
| 22                    | Slovenian  | brown                | G          | C          | GA        | T          | G          | C         | 0,008    | 0,071            | 0,921     |
| 23                    | Slovenian  | intermediate         | G          | C          | G         | CT         | G          | T         | 0,393    | 0,152            | 0,455     |
| 24                    | Slovenian  | intermediate         | G          | CT         | GA        | T          | T          | CT        | 0,007    | 0,163            | 0,830     |
| 25                    | Slovenian  | brown                | G          | CT         | G         | CT         | G          | C         | 0,317    | 0,193            | 0,490     |
| 26                    | Slovenian  | blue                 | G          | C          | G         | C          | GT         | C         | 0,919    | 0,048            | 0,033     |
| 27                    | Slovenian  | blue                 | G          | C          | G         | C          | GT         | C         | 0,919    | 0,048            | 0,033     |
| 28                    | Slovenian  | blue                 | G          | C          | G         | C          | G          | CT        | 0,962    | 0,025            | 0,013     |
| 29                    | Slovenian  | brown                | G          | C          | G         | CT         | GT         | T         | 0,277    | 0,179            | 0,543     |
| 30                    | Slovenian  | brown                | G          | C          | GA        | CT         | GT         | C         | 0,299    | 0,253            | 0,448     |
| 31                    | Slovenian  | blue                 | G          | C          | G         | C          | T          | CT        | 0,899    | 0,066            | 0,035     |
| 32                    | Slovenian  | blue                 | G          | C          | G         | C          | G          | T         | 0,970    | 0,021            | 0,009     |
| 33                    | Slovenian  | blue                 | G          | C          | G         | C          | T          | C         | 0,870    | 0,076            | 0,053     |
| 34                    | Slovenian  | blue                 | G          | C          | G         | C          | GT         | C         | 0,919    | 0,048            | 0,033     |
| 35                    | Slovenian  | blue                 | G          | C          | GA        | C          | G          | CT        | 0,973    | 0,023            | 0,004     |
| 36                    | Slovenian  | blue                 | G          | C          | G         | C          | GT         | CT        | 0,937    | 0,041            | 0,022     |
| 37                    | Slovenian  | brown                | GC         | CT         | GA        | T          | G          | CT        | 0,005    | 0,087            | 0,908     |
| 38                    | Slovenian  | blue                 | G          | C          | G         | C          | G          | C         | 0,950    | 0,030            | 0,020     |
| 39                    | Slovenian  | brown                | G          | C          | G         | CT         | GT         | C         | 0,150    | 0,140            | 0,711     |
| 40                    | Slovenian  | blue                 | G          | C          | G         | C          | GT         | CT        | 0,937    | 0,041            | 0,022     |
| 41                    | Slovenian  | blue                 | G          | C          | G         | C          | GT         | C         | 0,919    | 0,048            | 0,033     |
| 42                    | Slovenian  | blue                 | G          | C          | G         | C          | GT         | CT        | 0,937    | 0,041            | 0,022     |
| 43                    | Slovenian  | blue                 | G          | C          | G         | C          | T          | C         | 0,870    | 0,076            | 0,053     |
| 44                    | Slovenian  | intermediate         | G          | C          | G         | C          | GT         | C         | 0,919    | 0,048            | 0,033     |
| 45                    | Slovenian  | blue                 | G          | C          | G         | C          | GT         | C         | 0,919    | 0,048            | 0,033     |
| 46                    | Slovenian  | brown                | G          | C          | G         | CT         | T          | C         | 0,094    | 0,148            | 0,758     |
| 47                    | Slovenian  | blue                 | G          | C          | GA        | C          | G          | C         | 0,966    | 0,027            | 0,007     |
| 48                    | Slovenian  | intermediate         | G          | C          | GA        | T          | G          | CT        | 0,012    | 0,090            | 0,898     |
| 49                    | Slovenian  | blue                 | G          | C          | G         | C          | GT         | C         | 0,919    | 0,048            | 0,033     |
| 50                    | Slovenian  | brown                | G          | CT         | G         | CT         | GT         | C         | 0,215    | 0,221            | 0,564     |
| 51                    | Slovenian  | blue                 | G          | C          | G         | C          | T          | C         | 0,870    | 0,076            | 0,053     |

|     |           |              |       |    |    |    |    |    |    |       |       |       |
|-----|-----------|--------------|-------|----|----|----|----|----|----|-------|-------|-------|
| 52  | Slovenian |              | brown | GC | C  | G  | CT | GT | C  | 0,040 | 0,083 | 0,877 |
| 53  | Slovenian | intermediate |       | G  | CT | G  | CT | G  | C  | 0,317 | 0,193 | 0,490 |
| 54  | Slovenian | intermediate |       | G  | C  | GA | CT | GT | CT | 0,375 | 0,264 | 0,361 |
| 55  | Slovenian | blue         |       | GC | C  | G  | C  | G  | C  | 0,857 | 0,059 | 0,085 |
| 56  | Slovenian |              | brown | G  | C  | G  | T  | G  | C  | 0,003 | 0,026 | 0,971 |
| 57  | Slovenian | intermediate |       | G  | CT | G  | CT | GT | T  | 0,359 | 0,254 | 0,387 |
| 58  | Slovenian | intermediate |       | G  | CT | G  | CT | GT | C  | 0,215 | 0,221 | 0,564 |
| 59  | Slovenian |              | brown | G  | C  | G  | CT | GT | CT | 0,207 | 0,161 | 0,632 |
| 60  | Slovenian | blue         |       | G  | C  | G  | C  | GT | CT | 0,937 | 0,041 | 0,022 |
| 61  | Slovenian | blue         |       | G  | C  | G  | C  | G  | CT | 0,962 | 0,025 | 0,013 |
| 62  | Slovenian | blue         |       | G  | CT | G  | C  | G  | CT | 0,965 | 0,027 | 0,007 |
| 63  | Slovenian |              | brown | G  | C  | G  | T  | G  | C  | 0,003 | 0,026 | 0,971 |
| 64  | Slovenian | intermediate |       | GC | C  | GA | CT | GT | CT | 0,143 | 0,222 | 0,635 |
| 65  | Slovenian | blue         |       | G  | C  | G  | C  | G  | C  | 0,950 | 0,030 | 0,020 |
| 66  | Slovenian |              | brown | G  | C  | G  | CT | GT | C  | 0,150 | 0,140 | 0,711 |
| 67  | Slovenian | intermediate |       | G  | C  | GA | CT | GT | C  | 0,299 | 0,253 | 0,448 |
| 68  | Slovenian | blue         |       | G  | C  | G  | C  | T  | CT | 0,899 | 0,066 | 0,035 |
| 69  | Slovenian | blue         |       | G  | C  | GA | CT | G  | CT | 0,503 | 0,211 | 0,286 |
| 70  | Slovenian | intermediate |       | GC | C  | G  | CT | GT | C  | 0,040 | 0,083 | 0,877 |
| 71  | Slovenian |              | brown | G  | C  | G  | CT | T  | CT | 0,134 | 0,175 | 0,691 |
| 72  | Slovenian |              | brown | G  | C  | G  | T  | G  | C  | 0,003 | 0,026 | 0,971 |
| 73  | Slovenian |              | brown | G  | C  | G  | CT | T  | C  | 0,094 | 0,148 | 0,758 |
| 74  | Slovenian | intermediate |       | G  | C  | G  | CT | GT | C  | 0,150 | 0,140 | 0,711 |
| 75  | Slovenian | blue         |       | G  | CT | G  | C  | T  | C  | 0,885 | 0,085 | 0,030 |
| 76  | Slovenian | blue         |       | G  | C  | G  | C  | G  | C  | 0,950 | 0,030 | 0,020 |
| 77  | Slovenian | blue         |       | G  | C  | G  | C  | GT | CT | 0,937 | 0,041 | 0,022 |
| 78  | Slovenian | intermediate |       | G  | CT | G  | CT | G  | C  | 0,317 | 0,193 | 0,490 |
| 79  | Slovenian | intermediate |       | G  | C  | GA | CT | G  | C  | 0,419 | 0,211 | 0,371 |
| 80  | Slovenian | intermediate |       | G  | C  | G  | CT | G  | C  | 0,229 | 0,128 | 0,643 |
| 81  | Slovenian | blue         |       | G  | C  | G  | C  | GT | T  | 0,951 | 0,034 | 0,014 |
| 82  | Slovenian |              | brown | G  | C  | G  | T  | GT | C  | 0,002 | 0,026 | 0,972 |
| 83  | Slovenian | intermediate |       | G  | CT | G  | CT | G  | CT | 0,400 | 0,203 | 0,397 |
| 84  | Slovenian | intermediate |       | G  | C  | G  | CT | T  | CT | 0,134 | 0,175 | 0,691 |
| 85  | Slovenian | intermediate |       | G  | C  | G  | C  | GT | C  | 0,919 | 0,048 | 0,033 |
| 86  | Slovenian |              | brown | G  | C  | GA | CT | G  | C  | 0,419 | 0,211 | 0,371 |
| 87  | Slovenian | intermediate |       | G  | C  | G  | C  | GT | C  | 0,919 | 0,048 | 0,033 |
| 88  | Slovenian | blue         |       | G  | C  | GA | C  | GT | CT | 0,955 | 0,038 | 0,007 |
| 89  | Slovenian | blue         |       | G  | C  | G  | C  | GT | C  | 0,919 | 0,048 | 0,033 |
| 90  | Slovenian | blue         |       | G  | C  | G  | C  | G  | C  | 0,950 | 0,030 | 0,020 |
| 91  | Slovenian |              | brown | G  | C  | G  | CT | GT | C  | 0,150 | 0,140 | 0,711 |
| 92  | Slovenian | blue         |       | G  | C  | G  | C  | G  | CT | 0,962 | 0,025 | 0,013 |
| 93  | Slovenian |              | brown | G  | C  | GA | T  | G  | CT | 0,012 | 0,090 | 0,898 |
| 94  | Slovenian | intermediate |       | G  | C  | G  | CT | GT | CT | 0,207 | 0,161 | 0,632 |
| 95  | Slovenian |              | brown | GC | C  | G  | CT | GT | C  | 0,040 | 0,083 | 0,877 |
| 96  | Slovenian | blue         |       | G  | C  | G  | C  | T  | C  | 0,870 | 0,076 | 0,053 |
| 97  | Slovenian | blue         |       | G  | C  | G  | C  | GT | CT | 0,937 | 0,041 | 0,022 |
| 98  | Slovenian | blue         |       | G  | C  | G  | C  | T  | T  | 0,921 | 0,056 | 0,023 |
| 99  | Slovenian | intermediate |       | G  | CT | G  | T  | GT | C  | 0,003 | 0,051 | 0,947 |
| 100 | Slovenian |              | brown | G  | C  | A  | T  | GT | C  | 0,013 | 0,178 | 0,809 |
| 101 | Slovenian | blue         |       | G  | C  | G  | C  | G  | C  | 0,950 | 0,030 | 0,020 |
| 102 | Slovenian |              | brown | G  | CT | G  | CT | G  | C  | 0,317 | 0,193 | 0,490 |
| 103 | Slovenian | blue         |       | G  | C  | G  | C  | G  | T  | 0,970 | 0,021 | 0,009 |
| 104 | Slovenian |              | brown | G  | C  | G  | T  | GT | CT | 0,002 | 0,034 | 0,964 |
| 105 | Slovenian | blue         |       | G  | C  | G  | C  | GT | CT | 0,937 | 0,041 | 0,022 |
