# Supplementary material for: Prediction of eye color in the Slovenian population using the IrisPlex SNPs
Source: Croat Med J. 2013 Aug;54(4):381–6. doi: 10.3325/cmj.2013.54.381 (PMC3760663; doi:10.3325/cmj.2013.54.381)
Supplement: Supplementary Tables 1 na2 [file CroatMedJ_54_s001.pdf]

## Supplementary tables 1 and 2

Supplementary Table 1: PCR primer sequences of the six IrisPlex polymorphisms including the two analyzed for the purpose of this study (SNPs rs12896399 and rs12203592)

| SNP-ID     | gene    | forward primer           | reversed primer        | ref.          |
|------------|---------|--------------------------|------------------------|---------------|
| rs12913832 | HERC2   | TGATAGCGTGCAGAACTTGACA   | TAATTCAAAATGCCCCCAAG   | Eiberg, 2008  |
| rs1393350  | TYR     | GGTGAATGATAACACGAACAGATT | GATGCGTGCATATCCACCAACT | Sulem, 2007   |
| rs1800407  | OCA2    | TGAAAGGCTGCCTCTGTTCT     | TATGGTCACAGGCGTGAAGA   | Duffy, 2007   |
| rs16891982 | SLC45A2 | GGAAACACGGAGTTGATGC      | CCAGAGGTGGAGAAGCAGAG   | Soejima, 2007 |
| rs12896399 | SLC24A4 | CTGGCGATCCAATTCTTTGT     | GACCCTGTGTGAGACCCAGT   | Walsh, 2013   |
| rs12203592 | IRF4    | AGGGCAGCTGATCTCTTCAG     | GCTTCGTCATATGGCTAAACCT | Walsh, 2013   |

Supplementary Table 2: SBE primer sequences of the six IrisPlex polymorphisms including the two analyzed for the purpose of this study (SNPs rs12896399 and rs12203592)

| SNP-ID     | gene    | SBE primer length (bp) | SBE extension primer (5'-3')                                    | primer conc. (μM) | alleles detected | ref.          |
|------------|---------|------------------------|-----------------------------------------------------------------|-------------------|------------------|---------------|
| rs12913832 | HERC2   | 25                     | TGATGATAGCGTGCAGAACTTGACA                                       | 1,50              | A/G              | Eiberg, 2008  |
| rs1393350  | TYR     | 50                     | <u>GACTGACTGACTGACTGACTGACTGACTGAG</u> TAAAGACCACAGATTT         | 1,00              | A/G              | self designed |
| rs1800407  | OCA2    | 55                     | <u>GACTGACTGACTGACTGACTGACTGACTGAC</u> GTGGCCAGGCATACCGGCTCTCCC | 0,01              | A/G              | Duffy, 2007   |
| rs16891982 | SLC45A2 | 45                     | <u>GACTGACTGACTGACT</u> AGAGGAGTCGAGGTTGGATGTTGGGGCTT           | 0,65              | C/G              | Soejima, 2007 |
| rs12896399 | SLC24A4 | 53                     | TTTTTTTTTTTTTTTTTTTTTTTTTTTTTTTTTTTTTTTTCTTTAGGTCAGTATATTTGGG   | 0,15              | G/T              | Walsh, 2013   |
| rs12203592 | IRF4    | 35                     | TTTTTTTTTTTTTTTTTTTTTTTTTCCACTTTGGTGGGTAAGAAGG                  | 0,3               | C/T              | Walsh, 2013   |
